# Supplementary material for: Fecundity, an overlooked life-history trait for coastal management of commercial molluscs?
Source: Frontiers journal article supplement (doi:10.3389/fmars.2023.1173629), 2023-05-22
Supplement: Presentation_1.pdf [file Presentation_1.pdf]

## Supplementary Material

### 1 SUPPLEMENTARY FIGURES

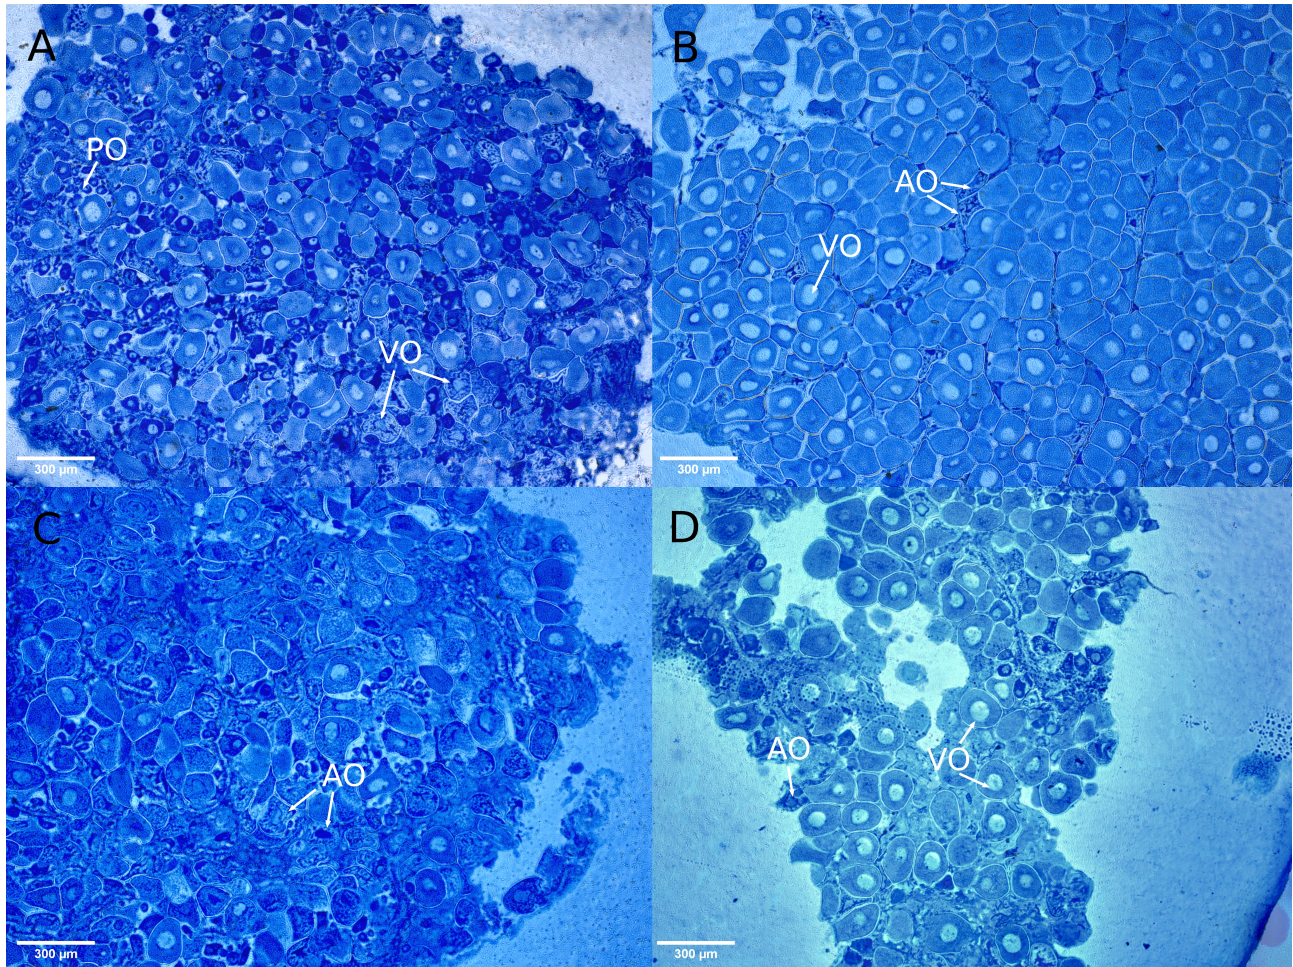

**Figure S1.** Histological gonadal sections of the limpet *Patella ordinaria* from the archipelago of Madeira (NE Atlantic Ocean) in the maturity stages of late active (A), ripe (B), atresic (C) and spawning (D). AO Atretic oocyte, PO Previtellogenic oocyte, VO Vitellogenic oocyte. Scale bar: 300 µm.

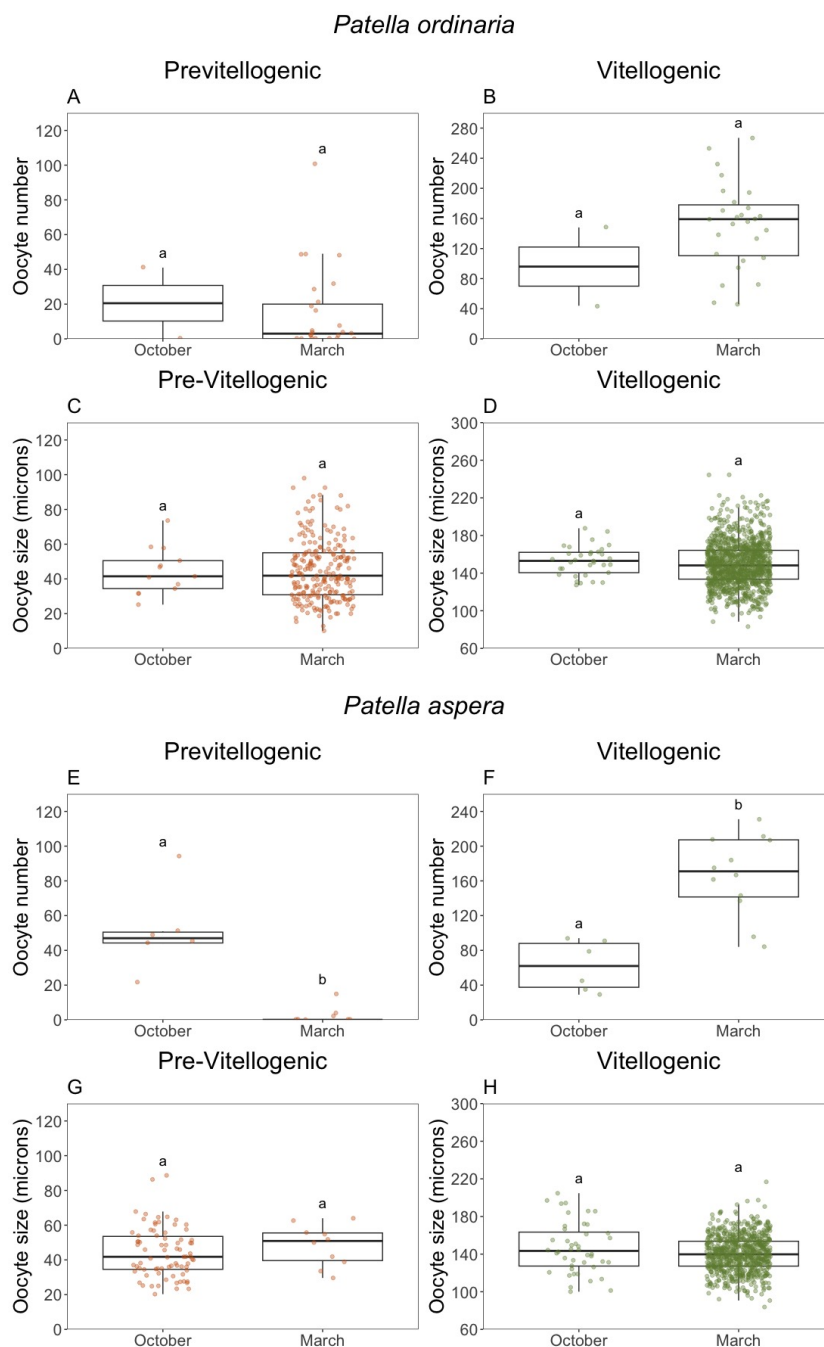

**Figure S2.** Monthly variation in the number and size of previtellogenic and vitellogenic oocytes of *Patella ordinaria* and *P. aspera* sampled in the south coast of the archipelago of Madeira (NE Atlantic Ocean). Boxplot shows the minimum and maximum values in the data, the 25<sup>th</sup> percentile, the median and the 75<sup>th</sup> percentile. Different letters indicate statistically significant differences between months ( $p < 0.05$ ).

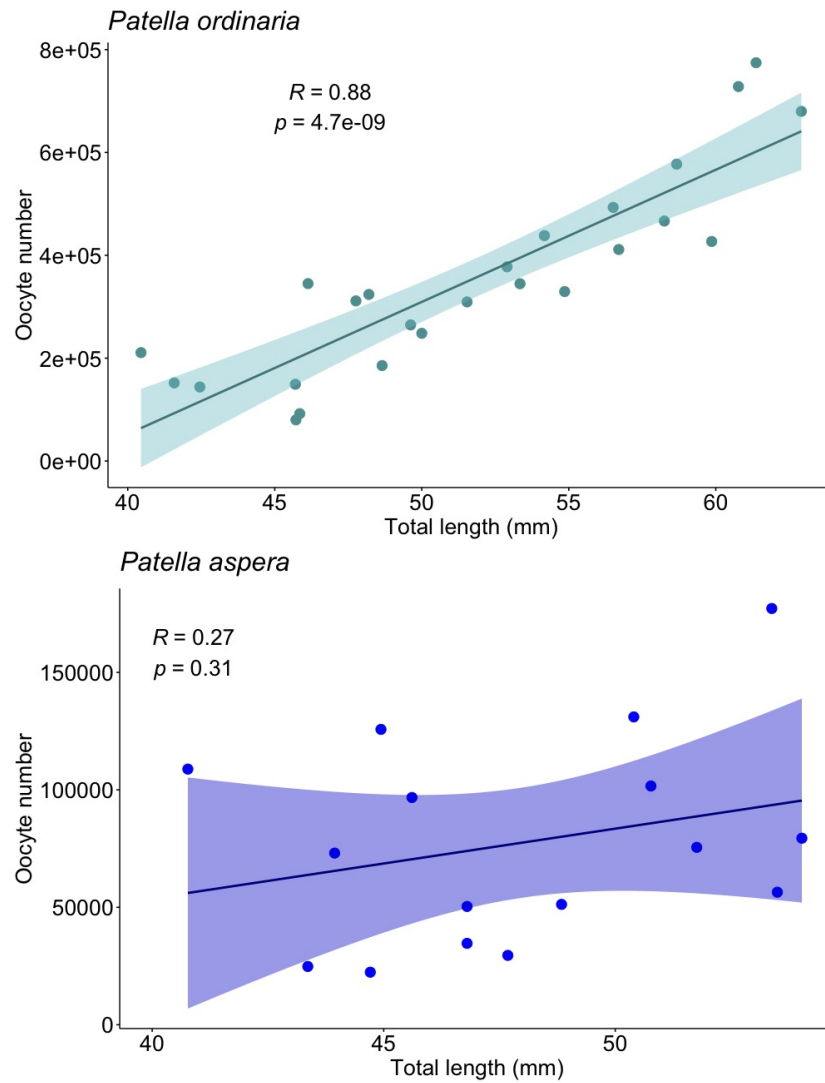

**Figure S3.** Linear relation between absolute batch fecundity and total length (TL, mm) for *Patella ordinaria* and *P. aspera* from the archipelago of Madeira (NE Atlantic Ocean). 95% confidence interval for the model is given by the painted area
